# Supplementary material
Source: PubMed Central journal article supplement (PMC6125166)
Supplement: NIHMS969786-supplement-1.pdf [file NIHMS969786-supplement-1.pdf]



ZIKV 1 IRCIGVSNRDFVEGMSGGTWVDVLEHGGCVTMAQDKPTVDIELVTTVSNMAEVRSYCYEASISDMAAS 70  
 WNV 1 FNCLGMSNRDFLEGSGATWVDLVEGDSCVTIMSKDKPTIDVKMMNMEANLAEVRSYCYLATVSDLSL 70  
 JEV 1 FNCLGMGRDFLEGSGATWVDLVEGDSCLTIMANDKPTLDVRMINI EASQLAEVRSYCYHASVTDIST 70  
 YFV 1 AHCIGITDRDFIEVHGTVWSATLEQDKCVTMAPDKPSLDISLETVAIDGPAEARKVCSAVLTHVKI 70  
 Dengue\_1 1 MRCVIGSRDFVEGLSGATWVDVLEHGGCVTMAQDKPTLDIELLKT EVTNPAVLRKLCIEAKISNTTT 70  
 Dengue\_2 1 MRCIGISNRDFVEGMSGGWDVLEHGGCVTMAKNKPTLDFELIKTEAKQPATLRKYCIEAKLTNTTT 70  
 Dengue\_3 1 MRCVGVGRDFVEGLSGATWVDVLEHGGCVTMAKNKPTLDIELQKTEATQLATLRKLCIEGKITNTTT 70  
 Dengue\_4 1 MRCVGVGRDFVEGMSGGAWVDLVEHGGCVTMAQGKPTLDFELTKT TAKEVALLRTYCIEASISNTTT 70



ZIKV 71 DSRCPQTGEAYLDKQSDTQYVCKRTLVDVRGWNGCGLFGKGSIVTCAKFAKCKRMTGKSIQPENLEYRIM 140  
 WNV 71 KAACTMGAEHNDKRADPAFVCRQGVVDRGWNGCGLFGKGSIDTCAKFAKCTKAI GRTILKENIKYEVA 140  
 JEV 71 VARCPPTMGAEHNDKRADSYVCKQPTDRGWNGCGLFGKGSIDTCAKFAKCTKAI GRTIQPENIKYEVG 140  
 YFV 71 NDKCPSTMGAEHLAENEGDNA CKRTYSDRGWNGCGLFGKGSIVACAKFTCAKSM LFEVDQTKIQYVIR 140  
 Dengue\_1 71 DSRCPQTGEATLVEEQDNFVCRRTFVDRGWNGCGLFGKGSIVTCAKFAKCVTLKGIQVYENLKYSVI 140  
 Dengue\_2 71 ESRCPTQGEPSLNEEQDKRFVCKHSMVDRGWNGCGLFGKGSIVTCAKFAKCVTLKGIQVYENLKYTVI 140  
 Dengue\_3 71 DSRCPQTGEAVLPEEQDQNYVCKHTYVDRGWNGCGLFGKGSIVTCAKFAKCVTLKGIQVYENLKYTVI 140  
 Dengue\_4 71 ATRCPQTGEPEYLKEEQDQYICRRDVVDRGWNGCGLFGKGSIVTCAKFAKCVTLKGIQVYENLKYTVI 140



ZIKV 141 LSVHGSQHSGLMIVNDTGHETDENRAKVEITPNSPRAEATLGGFGLGLDCEPR TGLDFSDIYYLTMMNKH 210  
 WNV 141 IFVHGPTTVESHGNYSTQXGATQAGRFSITPAAPSYTLKLG EYGEVTVDC EPRSGIDTNAYVMTVGTKT 210  
 JEV 141 IFVHGPTTVSENHGNYSAQVGASQAQFTVTPNAPSITLKLGDYGEVTLDC EPRSGINTEAFVMTVGSKS 210  
 YFV 141 AQLHVGAQKQEN-N-T-----DIKTLKFDALSGSQEAEFTCYGKATLECCVQTAVDFSNYSIAEMEKES 202  
 Dengue\_1 141 VTVHTGDQH-QVGN EST---EHGTTATITPQAPTSEIQLTDY GALTLD CSPRTGLDFNEMVLLTMKEKS 205  
 Dengue\_2 141 ITPHSGEEH-AVGN DTC---KHGKEIKITPQSSITEAE LTYGVTVME CSPRTGLDFNEMVLLQMEDKA 205  
 Dengue\_3 141 ITVHTGDQH-QVGN ET-----QGVTAETITPQASTTEA I LPEYGLGLE CSPRTGLDFNEMVLLTMKKA 203  
 Dengue\_4 141 VTVHNGDTH-AVGN DTS---NHGVTATITPSPVSEVVKLPDY GELTLDCEPRSGIDFNEMILMKMKKT 205



ZIKV 211 WLVHKEWFHDIPLPWHAGADTCTPHWNNKEALVEFKDAHAKRQT VVVLGSGQEGAVHTALAGALEAEMDGA 280  
 WNV 211 FLVHREWFMDLNLPSWSSAGS---TWWRNRETLMFEFEPHATKQSVIALG SQEGALHQALAGAI PVFSSN 277  
 JEV 211 FLVHREWFHDLSPWTPSSS---TAWRNRELLMEPEEAHATKQSVV ALGSGQEGALHQALAGAI VVYSS- 276  
 YFV 203 WIVDRQWAQDLTLPWQSGSG---GVWREMHHLVEFEPHAA TIKVLALGNQEGSLTALTAMRVTKDNT 269  
 Dengue\_1 206 WLVHKEWFHDLPLPWTS GASTSQETWNRQDLLVTFKTAHAKRQEVVVLG SQEGAMHTALTGATEIQTSG- 274  
 Dengue\_2 206 WLVHKEWFHDLPLPWLP GADTQGSNWIQKETLVTFKNHAKRQDVVVLG SQEGAMHTALTGATEIQMSS- 274  
 Dengue\_3 204 WLVHKEWFHDLPLPWTS GATTETPTWNRKELLVTFKNAHAKRQEVVVLG SQEGAMHTALTGATEIQNSG- 272  
 Dengue\_4 206 WLVHKEWFHDLPLPW TADGADTSEVHWNYKERMVTFKVP HAKRQDVVVLG SQEGAMHSALAGATEVDSGD- 274



ZIKV 281 ---KGRLLSSGHLKCR LKMDKLR LKGVSYSLCTAAPTFTKIPAE TLHGT VTVVEVQYAGTDGCKVPAQMAV 347  
 WNV 278 ---TVKLTSGHLKCR LKMEKQLKGTTYGVCSKAFKFLGTPADTGHGT VVLELQYTGTDGCKVPISSVA 344  
 JEV 277 ---SVKLTSGHLKCR LKMDKLR LKGVSYSLCTAAPTFTKIPAE TLHGT VTVVEVQYAGTDGCKVPISSVA 343  
 YFV 270 XSNLYKLGHHGVS CRVLSALTLKGTSYKMTDKMSFVNKPTDGHGT AVMQVVKPKG-APCRI PVMVAD 338  
 Dengue\_1 275 ---TTTIFAGHLKCR LKMDKLR LKGVSYSLCTAAPTFTKIPAE TLHGT VTVVEVQYAGTDGCKVPISSVA 341  
 Dengue\_2 275 ---GNLFTGHLKCR LKMDKLR LKGVSYSLCTAAPTFTKIPAE TLHGT VTVVEVQYAGTDGCKVPISSVA 341  
 Dengue\_3 273 ---GTSIFAGHLKCR LKMDKLR LKGVSYSLCTAAPTFTKIPAE TLHGT VTVVEVQYAGTDGCKVPISSVA 339  
 Dengue\_4 275 ---GNHMFAGHLKCR LKMDKLR LKGVSYSLCTAAPTFTKIPAE TLHGT VTVVEVQYAGTDGCKVPISSVA 341

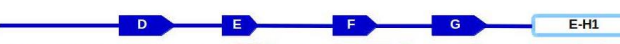

ZIKV 348 DMQTLTPVGR LITANP VITESTENSKMMLELDPPFGDSYIVIGVGEKKITHHWRS GSTIGKAF EATVRG 417  
 WNV 345 SLNDLTPVGR LITANP VIVATANAKVLELEPPFGDSYIVVGRGEQQINHHWKS GSSIGKAF TTTLKG 414  
 JEV 344 SLNDMTPVGR LITANP FVATSSNSKVLVEMEPFFGDSYIVVGRGDKQINHHWKA GSTIGKAFSTTLKG 413  
 YFV 339 DLTAAVNKGLVITANP IASTN--DDEVLEVNPPFGDSYIIVGTGDSRLTYQWHK GSSIGKLFQTMKG 406  
 Dengue\_1 342 EK-GVTQNGRLITANP IVTDK--EKPVNIEAEPFFGDSYIIVGAGEKALKLSWFK GSSIGKMF EATARG 408  
 Dengue\_2 342 LE-KRHVLRGLITANP IVTEK--DSPVNIEAEPFFGDSYIIVGEPGQLKLNWFK GSSIGQMFE TMRG 408  
 Dengue\_3 340 GQ-GKAHNGRLITANP VVTKK--EKPVNIEAEPFFGDSYIIVGIDNALKINWYK GSSIGKMF EATARG 406  
 Dengue\_4 342 VN-KEKVVGR LITANP IASTN--NSVTNIELEPPFGDSYIVIGVDSALTLHWFRK GSSIGKMF EATARG 408



ZIKV 418 AKRMAVLGDTAWDFG SVGGALNSLKGQIHQIFGAARF KSLFCGMSWFSQILIGTLLVWLG LNTKNGSISLT 487  
 WNV 415 AQRLLAALGDTAWDFG SVGGVFTSVGKAVHQVFGAARF RSLFCGMSWITQGLL GALLLWGINADR SIALT 484  
 JEV 414 AQRLLAALGDTAWDFG SVGGVFNISGKAVHQVFGAARF RFLFCGMSWITQGLM GALLLWGVNADR SIALA 483  
 YFV 407 AERLAVMGDAAWDFG SVGGVFTSVGKAVHQVFGAARF QGLFGLSWITKVMGAVLIVG INTRNMTMSMS 476  
 Dengue\_1 409 ARMAILGDTAWDFG SVGGVFTSVGKLVHQIFGTAYGVLFSGVSWTMKIGI GVLTLWGLNRSRSTLSMT 478  
 Dengue\_2 409 AKRMAILGDTAWDFG SVGGVFTSVGKALHQVFGAARF YGAAFSGVSWTMKILIGV IITWGMNRSRSTLSVS 478  
 Dengue\_3 407 ARMAILGDTAWDFG SVGGVFNLSLKGQVHQIFGSAYTALFSGVSWTMKIGI GVLTLWGLNRSRSTLSMFS 476  
 Dengue\_4 409 AKRMAILGDTAWDFG SVGGVFTSVGKAVHQVFGSVYITMFCGMSWIMRILIG FLVLIWGLNRSRSTMSMT 478

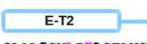

ZIKV 488 CLALGGVLIPLSTAVSA 504  
 WNV 485 FLAVGGVLIPLSVNVHA 501  
 JEV 484 FLATGGVLIPLATNVHA 500  
 YFV 477 MILVGVIMFPLSLGVGA 493  
 Dengue\_1 479 CIAVGLVTLVYLGVMVQA 495  
 Dengue\_2 479 LVLVGVVTLVYLGVMVQA 495  
 Dengue\_3 477 CIAIGIITVYLGAVVQA 493  
 Dengue\_4 479 CIAVGGITFLGFTVQA 495

**Figure S1. Sequence alignment of consensus sequences of ZIKV, WNV, JEV, YFV and DENV (related to Figure 3).** Conserved residues are shown in bold font and highlighted in green. Secondary structure elements of ZIKV are indicated above each set and are colored red, yellow and blue for E-DI, E-DII and E-DIII, respectively. Similar residue substitutions in ZIKV, WNV and JEV are represented in magenta font. Stretches of residues specific for ZIKV and different from other flaviviruses are highlighted in red. Conserved asparagine residues are shown in blue font.

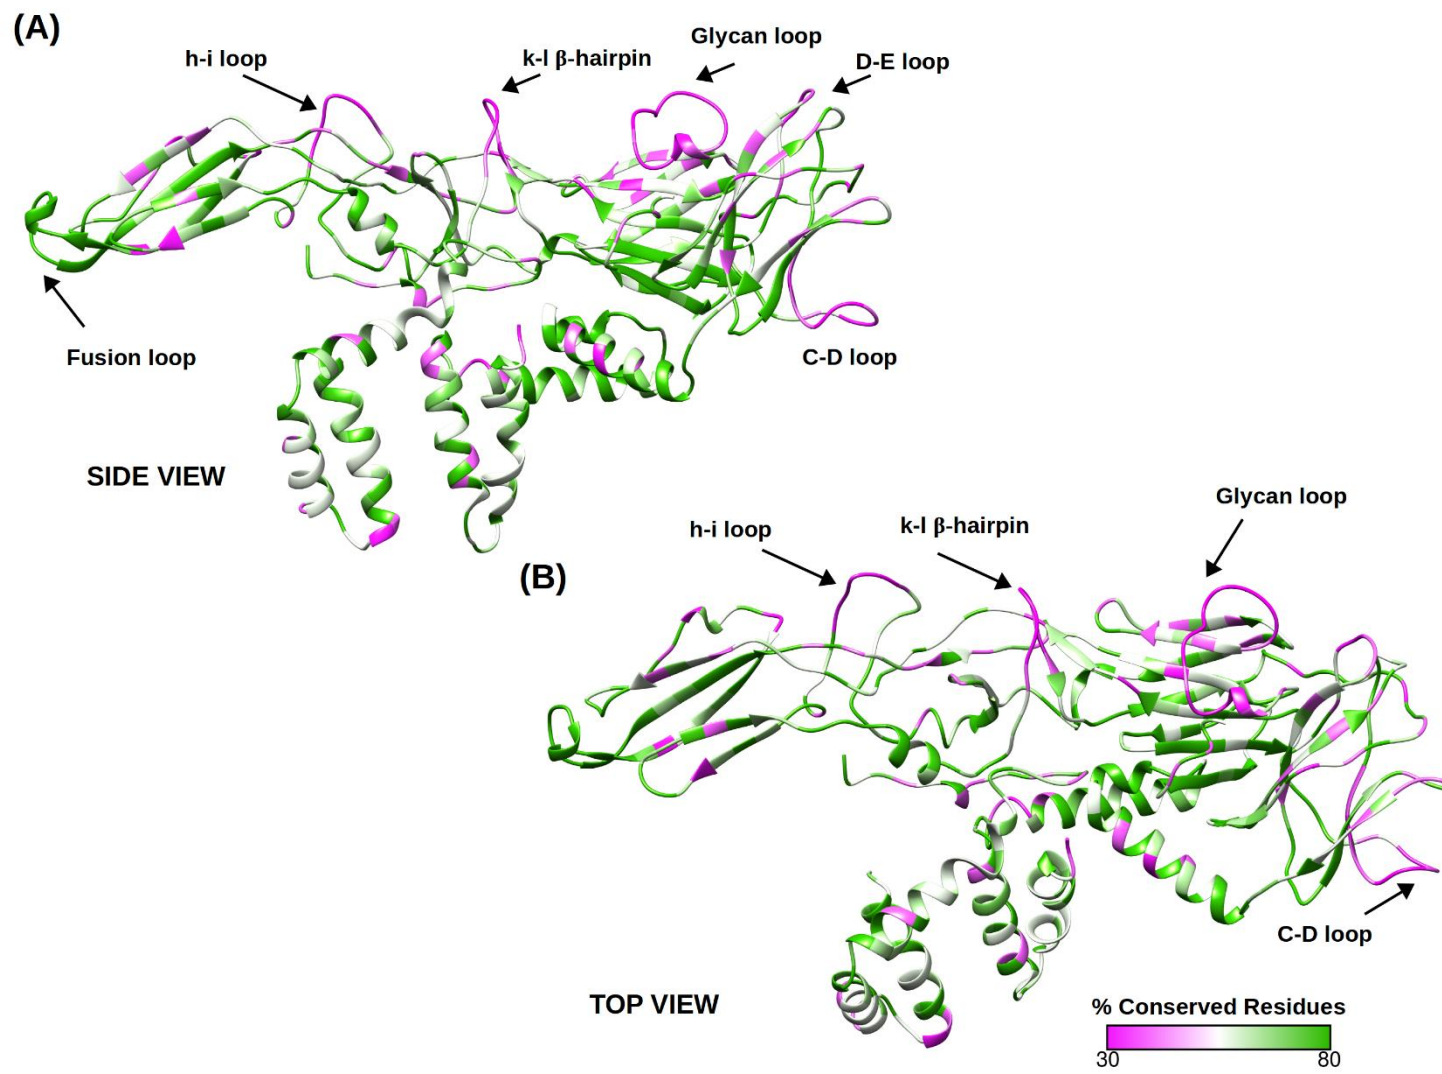

**Figure S2. Sequence conservation shown on ZIKV monomer (related to Figure 3).** Highly conserved regions are colored in green and less conserved regions are colored in magenta.



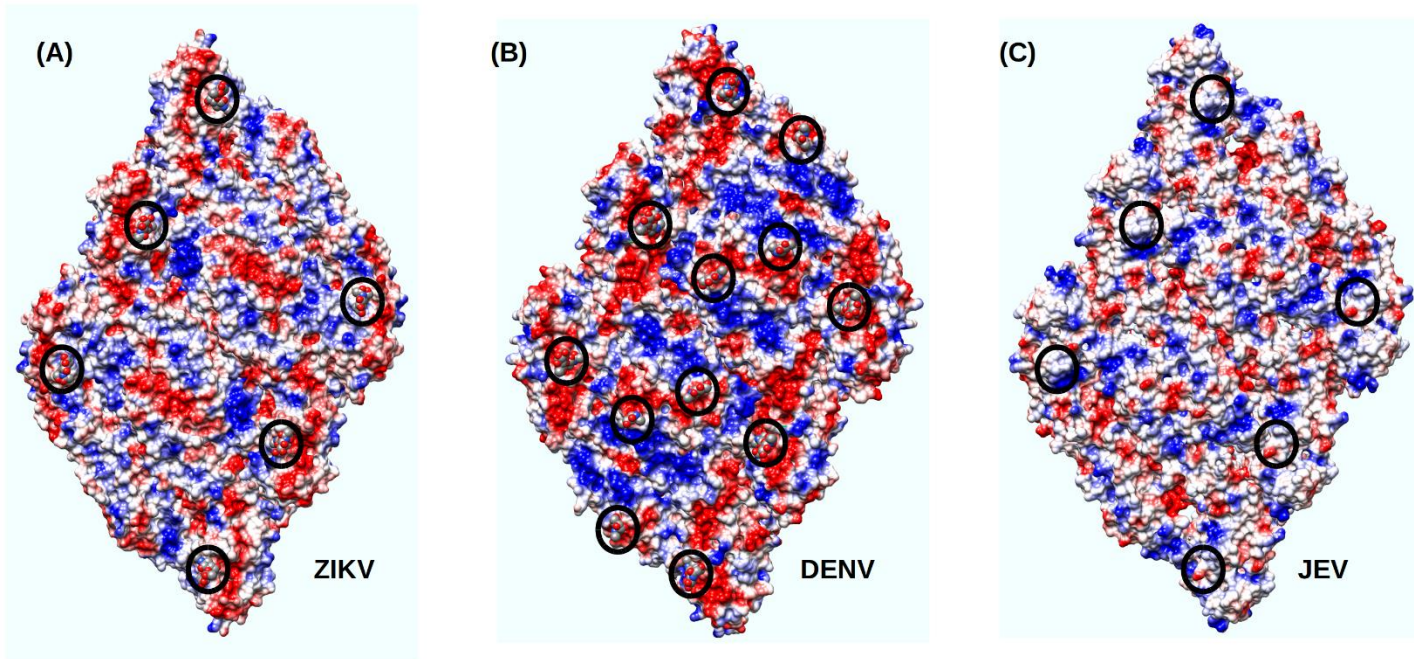

**Figure S3. Electrostatic surface plots of ZIKV, DENV and JEV (related to Figure 5).** Electrostatic surface potential between +10 (blue) and -10 (red)  $k_B T e c^{-1}$  ( $k_B$ =Boltzmann's constant, T is temperature of calculation in K and  $e c^{-1}$  is the charge of the electron) plotted on surface of ZIKV, DENV and JEV. The glycosylation sites are marked by black circles.

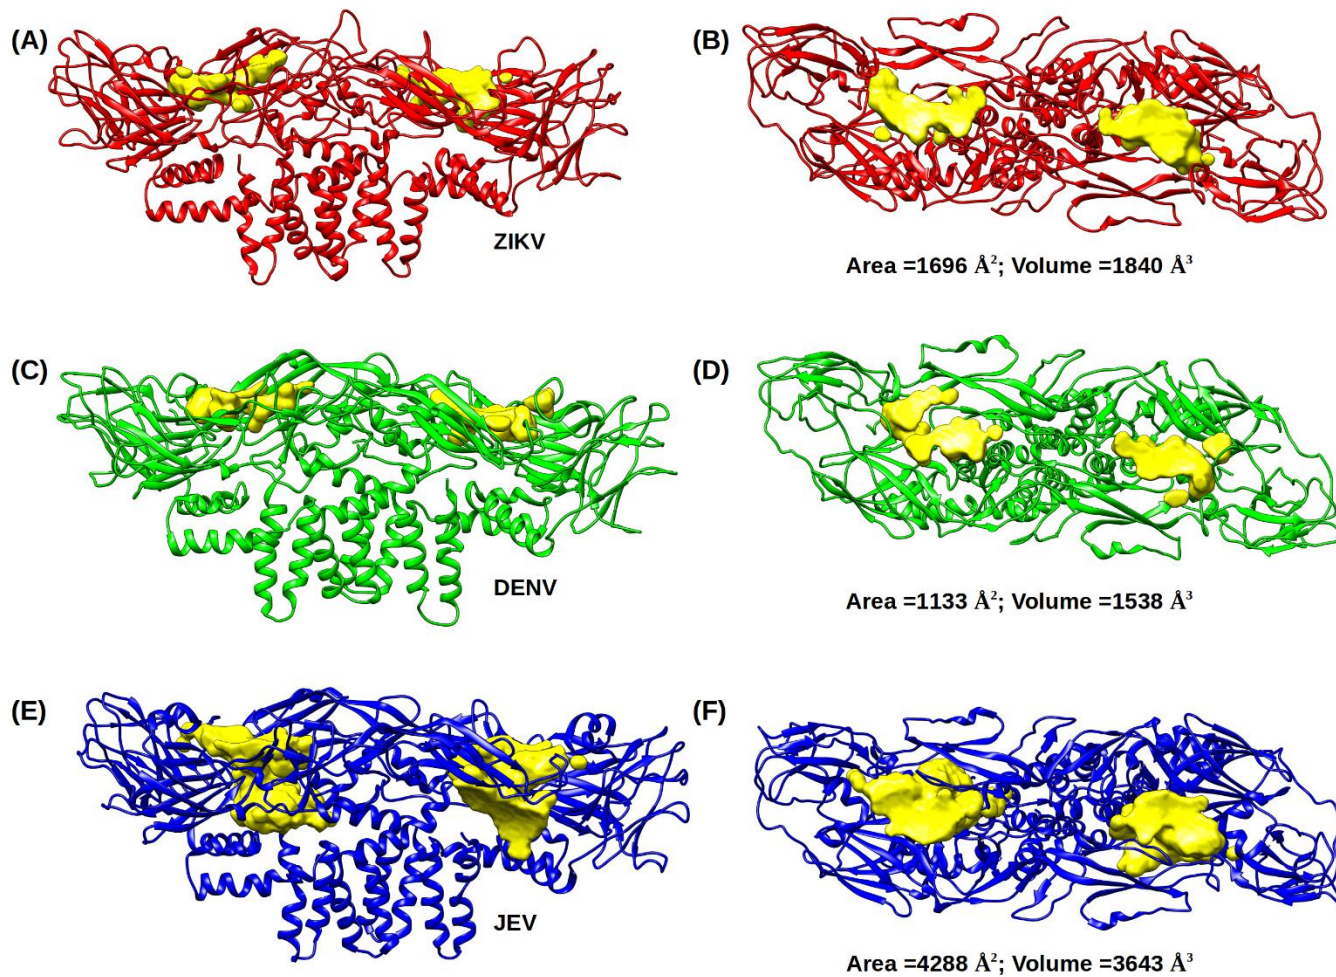

**Figure S4.** Accessible pockets enclosed by E-M heterodimers in ZIKV, DENV and JEV (related to Figure 5). Panels A, C and E are side views of the dimers and panels B, D and F represent top views of the pockets enclosed by the dimers.

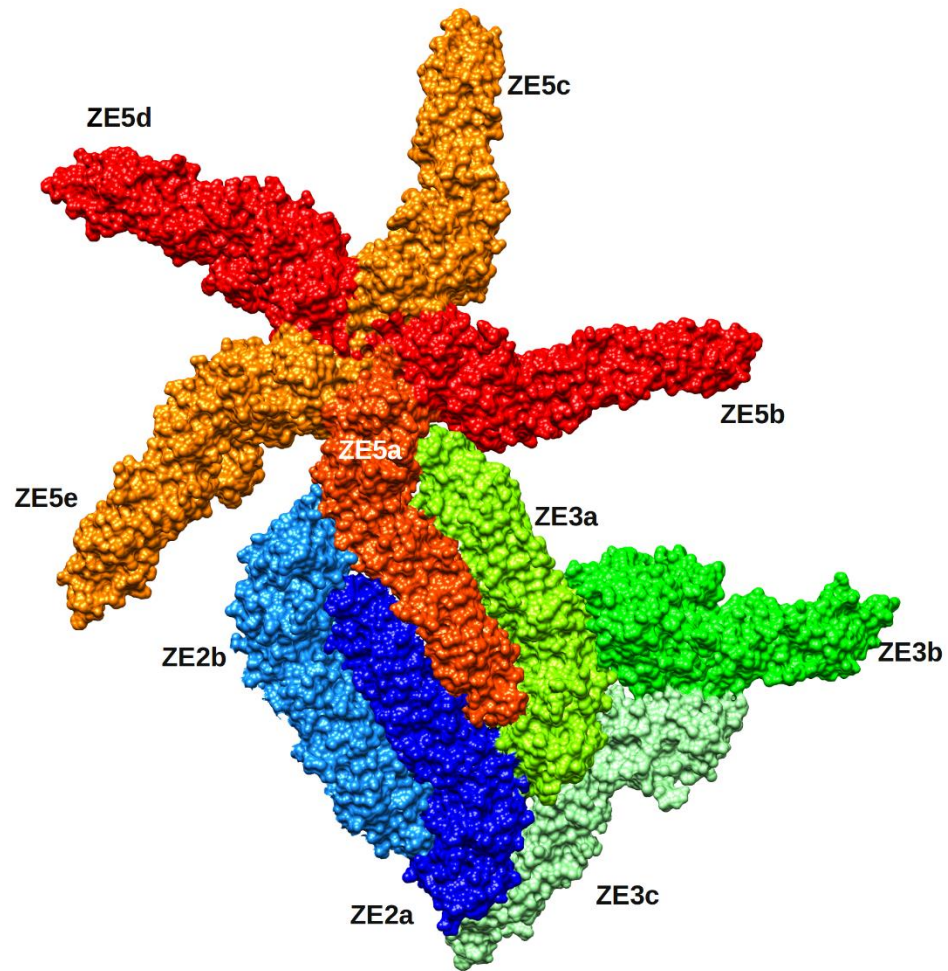

**Figure S5. Labelling of the ZIKV E monomer chains described in Tables S2, S3 and S4 (related to Figure 5).** ZIKV E monomer chains at a 5-fold axis (red) are labelled ZE5a, ZE5b, ZE5c, ZE5D and ZE5e; at a 3-fold axis (green) are labelled as ZE3a, ZE3b and ZE3c; and at a 2-fold axis (blue and light blue) are labelled ZE2a and ZE2b, respectively.

## Supplementary Tables

**Table S1. Secondary structure (SS) elements in ZIKV E and M proteins and their interactions**

(related to Figure 1). E protein domains 1, 2 and 3 are labelled E-DI, E-DII and E-DIII and the transmembrane domain as TM. Highly conserved residues are underlined. E protein domains (Domain/SS) E-DI, E-DII, E-DIII, and transmembrane (TM); M protein and the hinge region are colored in red, yellow, blue, light blue, brown and green, respectively.

| Domain/SS                           | Residue range       | Interactions/Residue Environment  |
|-------------------------------------|---------------------|-----------------------------------|
| <b>E-DI</b>                         |                     |                                   |
| N-term                              | 1-9                 | 2-fold                            |
| A <sub>0</sub>                      | <u>10-15</u>        |                                   |
| B <sub>0</sub>                      | <u>19-24</u>        | E-M                               |
| C <sub>0</sub>                      | <u>30-35</u>        |                                   |
| Loop C <sub>0</sub> -D <sub>0</sub> | <u>36-40</u>        | 3-fold                            |
| D <sub>0</sub>                      | 41-46               |                                   |
| E <sub>0</sub>                      | 136-143             |                                   |
| Loop E <sub>0</sub> -F <sub>0</sub> | 144-164             | <b>Glycosylation Loop, 2-fold</b> |
| F <sub>0</sub>                      | 165-169             |                                   |
| G <sub>0</sub>                      | 174-181             | 3-fold                            |
| H <sub>0</sub>                      | 184-190             |                                   |
| I <sub>0</sub>                      | 288-294             |                                   |
| 3 <sub>10</sub> helix               | 4-6,149-151,193-195 |                                   |
| <b>DI-DII Hinge</b>                 |                     |                                   |
| Loop D <sub>0</sub> -a              | 47-50               |                                   |
| Loop e-E <sub>0</sub>               | 129-134             | 3-fold                            |
| Loop H <sub>0</sub> -f              | 191-199             | 3-fold                            |
| Loop l-I <sub>0</sub>               | 281-288             | E-M                               |
| <b>E-DII</b>                        |                     |                                   |
| a                                   | 54-58               |                                   |
| b                                   | 63-73               |                                   |
| c                                   | 91-98               |                                   |
| Loop c-d                            | <u>99-109</u>       | <b>Fusion loop, 2-fold</b>        |
| d                                   | <u>110-121</u>      |                                   |
| e                                   | <u>126-128</u>      |                                   |
| f                                   | 200-206             |                                   |
| g                                   | <u>210-215</u>      | E-M                               |
| Helix-A                             | <u>215-220</u>      | E-M                               |
| h and Loop h-i                      | 224-243             | E-M                               |
| i                                   | 244-247             | E-M                               |
| Loop i-j                            | 247-253             | E-M and 2-fold                    |
| j                                   | <u>253-257</u>      |                                   |
| j-Helix-B                           | <u>258-260</u>      | 2-fold                            |
| Helix-B                             | <u>261-269</u>      | 2-fold, E-M                       |
| Helix-B-k                           | <u>270-272</u>      | E-M                               |
| K                                   | <u>273-277</u>      |                                   |
| Loop k-l                            | 278-280             | E-M                               |
| l                                   | 281-285             | 2-fold                            |

|                        |                |                   |
|------------------------|----------------|-------------------|
| <b>DI-DIII Hinge</b>   |                |                   |
| Loop L <sub>0</sub> -A | <u>295-305</u> | 5-fold and 3-fold |
| <b>E-DIII</b>          |                |                   |
| A                      | <u>313-319</u> | 2 and 5-fold      |
| B                      | <u>327-332</u> | 2 and 5-fold      |
| C                      | <u>338-344</u> | 5-fold            |
| Loop C-D               | <u>345-360</u> | 3 and 5-fold      |
| D                      | <u>361-366</u> |                   |
| E                      | <u>372-375</u> |                   |
| Loop E-F               | <u>376-383</u> |                   |
| F                      | <u>384-389</u> | 5-fold            |
| Loop F-G               | <u>390-395</u> | 5-fold            |
| G                      | <u>396-401</u> |                   |
| <b>TM</b>              |                |                   |
| E-H1                   | <u>406-424</u> |                   |
| E-H2                   | <u>425-429</u> |                   |
| Loop E-H2-H3           | <u>430-436</u> |                   |
| E-H3                   | <u>437-457</u> |                   |
| E-H3-T1                | <u>458-461</u> | E-M               |
| E-T1                   | <u>462-478</u> | E-M               |
| E-T2                   | <u>484-499</u> |                   |
| <b>M</b>               |                |                   |
| N-term                 | 1-22           | E-M               |
| M-H1                   | 22-39          | E-M               |
| M-H2                   | 40-50          |                   |
| M-H3                   | 57-72          |                   |



**Table S2. Interactions less than 3.2 Å at the 5-fold axis (related to Figure 5).** The E monomer chains at the 5-fold axis are indicated as ZE5a, ZE5b, ZE5c, ZE5d and ZE5e for ZIKV; DE5a, DE5b, DE5c, DE5d and DE5e for DENV; JE5a, JE5b, JE5c, JE5d and JE5e for JEV (Figure S5). Secondary structure elements are labelled as described in Table S1. E protein domains (E-D/SS) E-DI, E-DII, E-DIII, and transmembrane (TM); M protein and the hinge region are colored in red, yellow, blue, light blue, brown and green respectively.

| ZIKV |            |                        |                 |                        |                  |
|------|------------|------------------------|-----------------|------------------------|------------------|
| No.  | Residue 1  | E-D/SS                 | Residue 2       | E-D/SS                 | Type             |
| 1.   | Val303ZE5a | Loop L <sub>0</sub> -A | Lys316ZE5e      | A                      | Hydrophobic      |
| 2.   | Ser304ZE5a | Loop L <sub>0</sub> -A | Phe314ZE5e      | A                      | Hydrophobic      |
| 3.   | Ser304ZE5a | Loop L <sub>0</sub> -A | Thr313ZE5e      | A                      | Polar            |
| 4.   | Ser304ZE5a | Loop L <sub>0</sub> -A | Gln313ZE5e      | A                      | Polar            |
| 5.   | Cys308ZE5a | Loop L <sub>0</sub> -A | Lys394ZE5e      | Loop F-G               | Polar (Backbone) |
| 6.   | Thr309ZE5a | Loop L <sub>0</sub> -A | Lys394ZE5e      | Loop F-G               | Polar            |
| 7.   | Thr313ZE5a | A                      | Ser304ZE5b      | Loop L <sub>0</sub> -A | Polar (Backbone) |
| 8.   | Phe314ZE5a | A                      | Ser304ZE5b      | Loop L <sub>0</sub> -A | Hydrophobic      |
| 9.   | Lys316ZE5a | A                      | Val303ZE5b      | Loop L <sub>0</sub> -A | Hydrophobic      |
| 10.  | Gln331ZE5a | B                      | Ser304ZE5b      | Loop L <sub>0</sub> -A | Polar            |
| 11.  | Gln344ZE5a | C                      | Met349ZE5e      | Loop C-D               | Hydrophobic      |
| 12.  | Asp348ZE5a | Loop C-D               | Thr351ZE5b      | Loop C-D               | Polar            |
| 13.  | Asp348ZE5a | Loop C-D               | Thr3531ZE5b     | Loop C-D               | Polar            |
| 14.  | Met349ZE5a | Loop C-D               | Leu353ZE5b      | Loop C-D               | Hydrophobic      |
| 15.  | Met349ZE5a | Loop C-D               | Gln344ZE5b      | C                      | Hydrophobic      |
| 16.  | Gln350ZE5a | Loop C-D               | Thr351ZE5b      | Loop C-D               | Polar            |
| 17.  | Gln350ZE5a | Loop C-D               | Gln350S/ZE5b    | Loop C-D               | Polar            |
| 18.  | Thr351ZE5a | Loop C-D               | Thr351ZE5b/ZE5e | Loop C-D               | Polar            |
| 19.  | Thr351ZE5a | Loop C-D               | Gln350ZE5e      | Loop C-D               | Polar            |
| 20.  | Thr351ZE5a | Loop C-D               | Asp348ZE5e      | Loop C-D               | Polar            |
| 21.  | Leu352ZE5a | Loop C-D               | Gln350ZE5e      | Loop C-D               | Hydrophobic      |
| 22.  | Leu352ZE5a | Loop C-D               | Met349ZE5e      | Loop C-D               | Hydrophobic      |
| 23.  | Thr353ZE5a | Loop C-D               | Asp348ZE5e      | Loop C-D               | Polar            |
| 24.  | Pro354ZE5a | Loop C-D               | Tyr386ZE5e      | F                      | Polar (Backbone) |
| 25.  | Tyr386ZE5a | F                      | Pro354ZE5b      | Loop C-D               | Polar (Backbone) |
| 26.  | Val391ZE5a | F                      | Glu393ZE5e      | Loop F-G               | Hydrophobic      |

|     |            |          |            |          |             |
|-----|------------|----------|------------|----------|-------------|
| 27. | Gly392ZE5a | Loop F-G | Glu393ZE5e | Loop F-G | Hydrophobic |
| 28. | Glu393ZE5a | Loop F-G | Val391ZE5b | F        | Hydrophobic |
| 29. | Glu393ZE5a | Loop F-G | Gly392ZE5b | Loop F-G | Hydrophobic |
| 30. | Lys394ZE5a | Loop F-G | Thr309ZE5b | Loop F-G | Polar       |
| 31. | Lys394ZE5a | Loop F-G | Cys308ZE5b | Loop F-G | Hydrophobic |

#### DENV

| No. | Residue 1  | E-D/SS                              | Residue 2  | E-D/SS                              | Type        |
|-----|------------|-------------------------------------|------------|-------------------------------------|-------------|
| 1.  | Asn37DE5a  | Loop C <sub>0</sub> -D <sub>0</sub> | Glu311DE5e | A                                   | Polar       |
| 2.  | Ser298DE5a | Loop L <sub>0</sub> -A              | Lys307S    | A                                   | Polar       |
| 3.  | Lys307DE5a | A                                   | Ser298DE5b | Loop L <sub>0</sub> -A              | Polar       |
| 4.  | Glu311DE5a | A                                   | Asn37DE5b  | Loop C <sub>0</sub> -D <sub>0</sub> | Polar       |
| 5.  | Glu338DE5a | C                                   | Lys388DE5e | G                                   | Polar       |
| 6.  | Glu343DE5a | Loop C-D                            | His346DE5b | Loop C-D                            | Hydrophobic |
| 7.  | Glu343DE5a | Loop C-D                            | Arg345DE5b | Loop C-D                            | Hydrophobic |
| 8.  | Glu343DE5a | Loop C-D                            | Val347DE5b | Loop C-D                            | Hydrophobic |
| 9.  | Glu343DE5a | Loop C-D                            | Arg345DE5b | Loop C-D                            | Hydrophobic |
| 10. | Arg345DE5a | Loop C-D                            | Glu343DE5e | Loop C-D                            | Polar       |
| 11. | His346DE5a | Loop C-D                            | Glu343DE5e | Loop C-D                            | Hydrophobic |
| 12. | Val347DE5a | Loop C-D                            | Glu343DE5e | Loop C-D                            | Hydrophobic |
| 13. | Lys388DE5a | G                                   | Glu338DE5b | C                                   | Polar       |

#### JEV

| No. | Residue 1  | E-D/SS                 | Residue 2       | E-D/SS                 | Type             |
|-----|------------|------------------------|-----------------|------------------------|------------------|
| 1.  | Thr299JE5a | Loop L <sub>0</sub> -A | Phe310JE5e      | A                      | Polar (Backbone) |
| 2.  | Thr299JE5a | Loop L <sub>0</sub> -A | Asn313JE5e      | A                      | Polar            |
| 3.  | Thr300JE5a | Loop L <sub>0</sub> -A | Phe310JE5e      | A                      | Polar (Backbone) |
| 4.  | Met303JE5a | Loop L <sub>0</sub> -A | Ile392JE5e      | G                      | Hydrophobic      |
| 5.  | Phe310JE5a | A                      | Thr299JE5b      | Loop L <sub>0</sub> -A | Polar (Backbone) |
| 6.  | Asn313JE5a | A                      | Thr299JE5b      | Loop L <sub>0</sub> -A | Polar            |
| 7.  | Asn346JE5a | Loop C-D               | Asn346JE5e/JE5b | Loop C-D               | Polar            |
| 8.  | Thr349JE5a | Loop C-D               | Tyr382JE5e      | F                      | Hydrophobic      |
| 9.  | Tyr382JE5a | F                      | Thr349JE5b      | Loop C-D               | Polar            |
| 10. | Arg387JE5a | Loop F-G               | Asp389JE5e      | Loop F-G               | Polar            |
| 11. | Arg387JE5a | Loop F-G               | Gln391JE5e      | G                      | Polar            |
| 12. | Arg387JE5a | Loop F-G               | Asp389JE5e      | Loop F-G               | Polar            |
| 13. | Arg387JE5a | Loop F-G               | Gly388JE5e      | Loop F-G               | Hydrophobic      |
| 14. | Gly388JE5a | Loop F-G               | Arg387JE5b      | Loop F-G               | Hydrophobic      |

|     |            |          |            |                        |             |
|-----|------------|----------|------------|------------------------|-------------|
| 15. | Asp389JE5a | Loop F-G | Arg387JE5b | Loop F-G               | Polar       |
| 16. | Lys390JE5a | Loop F-G | Arg387JE5b | Loop F-G               | Polar       |
| 17. | Gln391JE5a | G        | Arg387JE5b | Loop F-G               | Polar       |
| 18. | Ile392JE5a | G        | Met303JE5b | Loop L <sub>0</sub> -A | Hydrophobic |

**Table S3. Interactions less than 3.2 Å at 3-fold axes (related to Figure 5).** The E monomer chains at the 3-fold axis are indicated as ZE3a, ZE3b and ZE3c for ZIKV; DE3a, DE3b and DE3c for DENV; and JE3a, JE3b and JE3c for JEV (Figure S5). Secondary structure elements are labelled as described in Table S1. E protein domains (E-D/SS) E-DI, E-DII, E-DIII, and transmembrane (TM); M protein and the hinge region are colored in red, yellow, blue, light blue, brown and green respectively.

| <b>ZIKV</b> |            |                                     |             |                                     |                  |
|-------------|------------|-------------------------------------|-------------|-------------------------------------|------------------|
| No.         | Residue 1  | E-D/SS                              | Residue 2   | E-D/SS                              | Type             |
| 1.          | Asp37ZE3a  | Loop C <sub>0</sub> -D <sub>0</sub> | Lys294ZE3b  | Loop L <sub>0</sub> -A              | Polar            |
| 2.          | Asp37ZE3a  | Loop C <sub>0</sub> -D <sub>0</sub> | Arg175ZE3b  | G <sub>0</sub>                      | Polar            |
| 3.          | Gln131ZE3a | Loop e-E <sub>0</sub>               | Gln350ZE3c  | Loop C-D                            | Polar            |
| 4.          | Arg175ZE3a | G <sub>0</sub>                      | Asp37ZE3c   | Loop C <sub>0</sub> -D <sub>0</sub> | Polar            |
| 5.          | Glu177ZE3a | G <sub>0</sub>                      | Val303ZE3c  | Loop L <sub>0</sub> -A              | Hydrophobic      |
| 6.          | Arg193ZE3a | Loop H <sub>0</sub> -f              | Pro354ZE3c  | Loop C-D                            | Hydrophobic      |
| 7.          | Arg193ZE3a | Loop H <sub>0</sub> -f              | Leu352ZE3c  | Loop C-D                            | Hydrophobic      |
| 8.          | Lys294ZE3a | Loop L <sub>0</sub> -A              | Asp37ZE3c   | Loop C <sub>0</sub> -D <sub>0</sub> | Polar            |
| 9.          | Val303ZE3a | Loop L <sub>0</sub> -A              | Glu177ZE3b  | G <sub>0</sub>                      | Hydrophobic      |
| 10.         | Gln350ZE3a | Loop C-D                            | Glu131ZE3b  | Loop e-E <sub>0</sub>               | Polar            |
| 11.         | Leu352ZE3a | Loop C-D                            | Arg193ZE3b  | Loop H <sub>0</sub> -f              | Hydrophobic      |
| 12.         | Pro354ZE3a | Loop C-D                            | Arg193ZE3b  | Loop H <sub>0</sub> -f              | Hydrophobic      |
| <b>DENV</b> |            |                                     |             |                                     |                  |
| No.         | Residue 1  | E-D/SS                              | Residue 2   | E-D/SS                              | Type             |
| 1.          | Gln52DE3a  | Loop D <sub>0</sub> -a              | Glu383DE3b  | Loop F-G                            | Polar            |
| 2.          | Gln131DE3a | Loop e-E <sub>0</sub>               | Glu343DE3b  | Loop C-D                            | Polar            |
| 3.          | Glu133DE3a | Loop e-E <sub>0</sub>               | Glu338DE3b  | Loop C-D                            | Polar            |
| 4.          | Glu133DE3a | Loop e-E <sub>0</sub>               | Arg345DE3b  | Loop C-D                            | Polar            |
| 5.          | Pro166DE3a | Loop F <sub>0</sub> -G <sub>0</sub> | Glu338DE3b  | Loop C-D                            | Polar (Backbone) |
| 6.          | Gln167DE3a | Loop F <sub>0</sub> -G <sub>0</sub> | Val1382DE3b | Loop F-G                            | Hydrophobic      |
| 7.          | Ser168DE3a | Loop F <sub>0</sub> -G <sub>0</sub> | Met301DE3b  | Loop L <sub>0</sub> -A              | Hydrophobic      |
| 8.          | Ile170DE3a | G <sub>0</sub>                      | Met297DE3b  | Loop L <sub>0</sub> -A              | Hydrophobic      |
| 9.          | Glu172DE3a | G <sub>0</sub>                      | Met297DE3b  | Loop L <sub>0</sub> -A              | Polar (Backbone) |
| 10.         | Met297DE3a | Loop L <sub>0</sub> -A              | Glu172DE3c  | G <sub>0</sub>                      | Polar (Backbone) |
| 11.         | Met297DE3a | Loop L <sub>0</sub> -A              | Ile170DE3c  | G <sub>0</sub>                      | Hydrophobic      |
| 12.         | Met301DE3a | Loop L <sub>0</sub> -A              | Ser168DE3c  | Loop F <sub>0</sub> -G <sub>0</sub> | Hydrophobic      |
| 13.         | Glu338DE3a | Loop C-D                            | Glu133DE3c  | Loop e-E <sub>0</sub>               | Polar            |
| 14.         | Glu338DE3a | Loop C-D                            | Pro166DE3c  | Loop F <sub>0</sub> -G <sub>0</sub> | Polar (Backbone) |



|     |            |          |            |                                     |             |
|-----|------------|----------|------------|-------------------------------------|-------------|
| 15. | Glu343DE3a | Loop C-D | Gln131DE3c | Loop e-E <sub>0</sub>               | Polar       |
| 16. | Arg345DE3a | Loop C-D | Glu133DE3c | Loop e-E <sub>0</sub>               | Polar       |
| 17. | Val382DE3a | Loop F-G | Gln167DE3c | Loop F <sub>0</sub> -G <sub>0</sub> | Hydrophobic |
| 18. | Glu383DE3a | Loop F-G | Gln52DE3c  | Loop D <sub>0</sub> -a              | Polar       |

**JEV**

| No. | Residue 1  | E-D/SS                 | Residue 2  | E-D/SS                 | Type        |
|-----|------------|------------------------|------------|------------------------|-------------|
| 1.  | Glu133JE3a | Loop e-E <sub>0</sub>  | Met348JE3c | Loop C-D               | Hydrophobic |
| 2.  | Thr177JE3a | G <sub>0</sub>         | Thr299JE3c | Loop L <sub>0</sub> -A | Polar       |
| 3.  | Glu185JE3a | H <sub>0</sub>         | Thr299JE3c | Loop L <sub>0</sub> -A | Polar       |
| 4.  | Thr299JE3a | Loop L <sub>0</sub> -A | Thr177JE3b | G <sub>0</sub>         | Polar       |
| 5.  | Thr299JE3a | Loop L <sub>0</sub> -A | Glu185JE3b | H <sub>0</sub>         | Polar       |
| 6.  | Met348JE3a | Loop C-D               | Glu133JE3b | Loop e-E <sub>0</sub>  | Hydrophobic |

**Table S4. Interactions less than 3.2 Å at 2-fold (E-E, E-M and M-M interactions) (related to Figure 5).** The E-M monomer chains at the 2-fold axis of ZIKV, DENV and JEV are indicated as ZE2a-ZM2a, ZE2b-ZM2b, DE2a-DM2a, DE2b-DM2b, JE2a-JM2a, and JE2b-JM2b, respectively (Figure S5). Secondary structure elements are labelled as described in Table S1. E protein domains (E-D/SS) E-DI, E-DII, E-DIII, and transmembrane (TM); M protein and the hinge region are colored in red, yellow, blue, light blue, brown and green respectively.

| <b>ZIKV</b>             |            |                |            |                                     |                  |
|-------------------------|------------|----------------|------------|-------------------------------------|------------------|
| No.                     | Residue 1  | E-D/SS         | Residue 2  | E-D/SS                              | Type             |
| <b>E-E Interactions</b> |            |                |            |                                     |                  |
| 1.                      | Asp98ZE2a  | Loop c-d       | Ser7ZE2b   | N-term                              | Polar            |
| 2.                      | Trp101ZE2a | Loop c-d       | Ser149ZE2b | Loop E <sub>0</sub> -F <sub>0</sub> | Polar            |
| 3.                      | Trp101ZE2a | Loop c-d       | Lys316ZE2b | A                                   | Hydrophobic      |
| 4.                      | Trp101ZE2a | Loop c-d       | Thr327ZE2b | B                                   | Hydrophobic      |
| 5.                      | Gly259ZE2a | j-αB           | His266ZE2b | αB                                  | Polar (Backbone) |
| 6.                      | Ser260ZE2a | j-αB           | Gly263ZE2b | αB                                  | Polar (Backbone) |
| 7.                      | Ser260ZE2a | j-αB           | Ser260ZE2b | j-αB                                | Polar            |
| 8.                      | Gly263ZE2a | αB             | Ser260ZE2b | j-αB                                | Polar (Backbone) |
| 9.                      | Gly263ZE2a | αB             | Gln261ZE2b | j-αB                                | Polar (Backbone) |
| 10.                     | His266ZE2a | αB             | Gly259ZE2b | j-αB                                | Polar (Backbone) |
| 11.                     | Ser285ZE2a | l              | His249ZE2b | Loop i-j                            | Polar            |
| 12.                     | Thr327ZE2a | B              | Trp101ZE2b | Loop c-d                            | Hydrophobic      |
| <b>E-M Interactions</b> |            |                |            |                                     |                  |
| 1.                      | Glu26ZE2a  | B <sub>0</sub> | Arg15ZM2a  | M-N-term                            | Polar            |
| 2.                      | His214ZE2a | g-αA-h         | His7ZM2a   | M-N-term                            | Polar            |
| 3.                      | Glu216ZE2a | g-αA-h         | Arg10ZM2a  | M-N-term                            | Polar            |
| 4.                      | Trp217ZE2a | g-αA-h         | Pro5ZM2a   | M-N-term                            | Polar (Backbone) |
| 5.                      | Asp220ZE2a | g-αA-h         | Asn34ZM2b  | M-H1                                | Polar            |
| 6.                      | Asp220ZE2a | g-αA-h         | Arg38ZM2a  | M-H1                                | Polar            |
| 7.                      | Glu240ZE2a | Loop h-i       | Arg23ZM2b  | M-H1                                | Polar            |
| 8.                      | Ala241ZE2a | Loop h-i       | Ala1ZM2a   | M-N-term                            | Hydrophobic      |
| 9.                      | Glu244ZE2a | i              | Ser22ZM2b  | M-N-term                            | Polar            |
| 10.                     | Glu244ZE2a | i              | Arg23ZM2b  | M-H1                                | Polar            |
| 11.                     | Ala268ZE2a | αB             | His7ZM2a   | M-N-term                            | Hydrophobic      |

|     |            |                  |           |          |             |
|-----|------------|------------------|-----------|----------|-------------|
| 12. | Leu269ZE2a | $\alpha$ B       | Trp19ZM2a | M-N-term | Polar       |
| 13. | Gly271ZE2a | $\alpha$ B-k     | Thr18ZM2a | M-N-term | Hydrophobic |
| 14. | Gly271ZE2a | $\alpha$ B-k     | Leu12ZM2a | M-N-term | Hydrophobic |
| 15. | Ala272ZE2a | $\alpha$ B-k     | Thr18ZM2a | M-N-term | Hydrophobic |
| 16. | Ala272ZE2a | $\alpha$ B-k     | Trp19ZM2a | M-N-term | Hydrophobic |
| 17. | Ser286ZE2a | l-I <sub>0</sub> | Thr14ZM2a | M-N-term | Polar       |
| 18. | Gly459ZE2a | E-H3-E-T1        | Tyr74ZM2b | M-C-term | Hydrophobic |
| 19. | Ser461ZE2a | E-H3-E-T1        | Glu24ZM2a | M-H1     | Polar       |
| 20. | Phe463ZE2a | E-T1             | Tyr74ZM2b | M-C-term | Hydrophobic |

#### M-M Interactions

|     |           |           |           |          |                  |
|-----|-----------|-----------|-----------|----------|------------------|
| 1.  | Val2ZM2a  | M-N-term  | Arg31ZM2b | M-H1     | Hydrophobic      |
| 2.  | Arg10ZM2a | M-N-term  | Asn39ZM2b | M-H1     | Polar            |
| 3.  | Arg10ZM2a | M-N-term  | Asn39ZM2b | M-H1     | Polar            |
| 4.  | His28ZM2a | M-H1      | Tyr74ZM2b | M-C-term | Polar            |
| 5.  | Arg31ZM2a | M-H1      | Val2ZM2b  | M-N-term | Polar (Backbone) |
| 6.  | Arg38ZM2a | M-H1      | Arg10ZM2b | M-N-term | Polar            |
| 7.  | Asn39ZM2a | M-H1      | Arg10ZM2b | M-N-term | Polar            |
| 8.  | Leu53ZM2a | M-H2-M-H3 | Gln59ZM2b | M-H3     | Hydrophobic      |
| 9.  | Ser55ZM2a | M-H2-M-H3 | Gln59ZM2b | M-H3     | Polar            |
| 10. | Gln59ZM2a | M-H3      | Tyr63ZM2b | M-H3     | Polar            |
| 11. | Leu69ZM2a | M-H3      | Ser75ZM2b | M-C-term | Hydrophobic      |
| 12. | Tyr74ZM2a | M-C-term  | His28ZM2b | M-H1     | Polar            |
| 13. | Ser75ZM2a | M-C-term  | Leu69ZM2b | M-H3     | Hydrophobic      |

#### DENV

| No. | Residue 1 | E-D/SS | Residue 2 | E-D/SS | Type |
|-----|-----------|--------|-----------|--------|------|
|-----|-----------|--------|-----------|--------|------|

#### E-E Interactions

|     |            |               |            |            |             |
|-----|------------|---------------|------------|------------|-------------|
| 1.  | Asp98DE2a  | Loop c-d      | Gln316DE2b | A          | Polar       |
| 2.  | Asp98DE2a  | Loop c-d      | Ile6DE2b   | N-term     | Hydrophobic |
| 3.  | Asp98DE2a  | Loop c-d      | Ser7DE2b   | N-term     | Polar       |
| 4.  | Asp98DE2a  | Loop c-d      | Gly5DE2b   | N-term     | Hydrophobic |
| 5.  | Trp101DE2a | Loop c-d      | Lys310DE2b | A          | Hydrophobic |
| 6.  | Phe108DE2a | d             | Thr315DE2b | A          | Hydrophobic |
| 7.  | Gly109DE2a | d             | Gln316DE2b | Loop A-B   | Hydrophobic |
| 8.  | Lys241DE2a | i             | Glu269DE2b | k          | Polar       |
| 9.  | Ser255DE2a | j- $\alpha$ B | Gly258DE2b | $\alpha$ B | Hydrophobic |
| 10. | Ser255DE2a | j- $\alpha$ B | Glu257DE2b | $\alpha$ B | Polar       |

|                         |            |                                     |            |               |                  |
|-------------------------|------------|-------------------------------------|------------|---------------|------------------|
| 11.                     | Gly258DE2a | $\alpha$ B                          | Ser255DE2b | j- $\alpha$ B | Hydrophobic      |
| 12.                     | His261DE2a | $\alpha$ B                          | Leu253DE2b | j             | Polar (Backbone) |
| 13.                     | Glu269DE2a | $\alpha$ B-k                        | Lys241DE2b | i             | Polar            |
| 14.                     | Lys310DE2a | A                                   | Trp101DE2b | Loop c-d      | Hydrophobic      |
| 15.                     | Thr315DE2a | A                                   | Gly109DE2b | d             | Hydrophobic      |
| <b>E-M Interactions</b> |            |                                     |            |               |                  |
| 1.                      | Glu26DE2a  | Loop B <sub>0</sub> -C <sub>0</sub> | Ala15DM2a  | M-N-term      | Hydrophobic      |
| 2.                      | Trp206DE2a | g                                   | Trp19DM2a  | M-N-term      | Hydrophobic      |
| 3.                      | His209DE2a | g                                   | His7DM2a   | M-N-term      | Polar            |
| 4.                      | His209DE2a | g                                   | Met10DM2a  | M-N-term      | Hydrophobic      |
| 5.                      | Trp212DE2a | $\alpha$ A                          | His7DM2a   | M-N-term      | Polar            |
| 6.                      | Lys241DE2a | i                                   | Trp19DM2b  | M-N-term      | Polar            |
| 7.                      | Pro243DE2a | i                                   | Glu17DM2b  | M-N-term      | Hydrophobic      |
| 8.                      | Gln256DE2a | j- $\alpha$ B                       | Val2DM2a   | M-N-term      | Hydrophobic      |
| 9.                      | Ala263DE2a | $\alpha$ B                          | Val5DM2a   | M-N-term      | Hydrophobic      |
| 10.                     | Gly266DE2a | $\alpha$ B-k                        | Thr18DM2a  | M-N-term      | Hydrophobic      |
| 11.                     | Ala267DE2a | $\alpha$ B-k                        | Trp19DM2a  | M-N-term      | Hydrophobic      |
| 12.                     | Thr280DE2a | Loop l-I <sub>0</sub>               | Thr16DM2a  | M-N-term      | Polar            |
| 13.                     | Ile414DE2a | E-H1                                | Glu13DM2a  | M-N-term      | Polar (Backbone) |
| 14.                     | Ser449DE2a | E-H3-E-T1                           | Gly9DM2a   | M-N-term      | Polar (Backbone) |
| 15.                     | Gly450DE2a | E-H3-E-T1                           | Gly9DM2a   | M-N-term      | Hydrophobic      |
| 16.                     | Ala495DE2a | E-C-term                            | Thr18DM2a  | M-N-term      | Polar (Backbone) |
| <b>M-M Interactions</b> |            |                                     |            |               |                  |
| 1.                      | Ala3DM2a   | M-N-term                            | Ala3DM2b   | M-N-term      | Hydrophobic      |
| 2.                      | Val5DM2a   | M-N-term                            | Arg31DM2b  | M-H1          | Hydrophobic      |
| 3.                      | Gln59DM2a  | M-H3                                | Gln59DM2b  | M-H3          | Polar            |
| <b>JEV</b>              |            |                                     |            |               |                  |
| No.                     | Residue 1  | E-D/SS                              | Residue 2  | E-D/SS        | Type             |
| <b>E-E Interactions</b> |            |                                     |            |               |                  |
| 1.                      | Trp101JE2a | Loop c-d                            | Lys312JE2b | A             | Hydrophobic      |
| 2.                      | Phe108JE2a | d                                   | Asp316JE2b | A             | Hydrophobic      |
| 3.                      | Lys209JE2a | g                                   | Val253JE2b | j             | Hydrophobic      |
| 4.                      | Val253JE2a | j                                   | Lys209JE2b | g             | Hydrophobic      |
| 5.                      | Ser257JE2a | j- $\alpha$ B                       | Gly260JE2b | $\alpha$ B    | Polar (Backbone) |
| 6.                      | Gln258JE2a | j- $\alpha$ B                       | Gly260JE2b | $\alpha$ B    | Hydrophobic      |
| 7.                      | Gly260JE2a | $\alpha$ B                          | Ser257JE2b | j- $\alpha$ B | Polar (Backbone) |



|                  |            |                                     |            |               |                  |
|------------------|------------|-------------------------------------|------------|---------------|------------------|
| 8.               | Gly260JE2a | $\alpha$ B                          | Gln258JE2b | j- $\alpha$ B | Hydrophobic      |
| 9.               | His263JE2a | $\alpha$ B                          | Gly256JE2b | j- $\alpha$ B | Hydrophobic      |
| 10.              | Lys312JE2a | A                                   | Trp101JE2b | Loop c-d      | Hydrophobic      |
| 11.              | Asp316JE2a | A                                   | Phe108JE2b | d             | Hydrophobic      |
| E-M Interactions |            |                                     |            |               |                  |
| 1.               | Glu26JE2a  | Loop B <sub>0</sub> -C <sub>0</sub> | Lys15JM2a  | M-N-term      | Polar            |
| 2.               | His214JE2a | g                                   | His7JM2a   | M-N-term      | Hydrophobic      |
| 3.               | His214JE2a | g                                   | Ser10JM2a  | M-N-term      | Polar            |
| 4.               | Glu216JE2a | $\alpha$ A                          | Arg38JM2b  | M-H1          | Polar            |
| 5.               | Trp217JE2a | $\alpha$ A                          | Gln5JM2a   | M-N-term      | Polar (Backbone) |
| 6.               | Trp217JE2a | $\alpha$ A                          | His7JM2a   | M-N-term      | Hydrophobic      |
| 7.               | Asp220JE2a | $\alpha$ A                          | Arg38JM2b  | M-H1          | Polar            |
| 8.               | Glu241JE2a | i                                   | Trp19JM2b  | M-N-term      | Hydrophobic      |
| 9.               | Glu241JE2a | i                                   | Leu20JM2b  | M-N-term      | Hydrophobic      |
| 10.              | Glu244JE2a | i                                   | Glu17JM2b  | M-N-term      | Hydrophobic      |
| 11.              | Glu244JE2a | i                                   | Thr16JM2b  | M-N-term      | Polar            |
| 12.              | Leu266JE2a | $\alpha$ B-k                        | Trp19JM2a  | M-N-term      | Hydrophobic      |
| 13.              | Ala267JE2a | $\alpha$ B-k                        | Trp19JM2a  | M-N-term      | Hydrophobic      |
| M-M Interactions |            |                                     |            |               |                  |
| 1.               | Ser1JM2a   | M-N-term                            | Lys31JM2b  | M-H1          | Polar            |
| 2.               | Phe63JM2a  | M-H3                                | Phe63JM2b  | M-H3          | Hydrophobic      |
| 3.               | Tyr74JM2a  | M-C-term                            | Leu69JM2b  | M-H3          | Hydrophobic      |
